# Supplementary material for: A Method for the Design and Development of Medical or Health Care Information Websites to Optimize Search Engine Results Page Rankings on Google
Source: PubMed Central journal article supplement (PMC3758043; doi:10.2196/jmir.2632), 2013-08-27

**Multimedia Appendix 2.** Scatterplots of WQA score against rankings on .com domains.

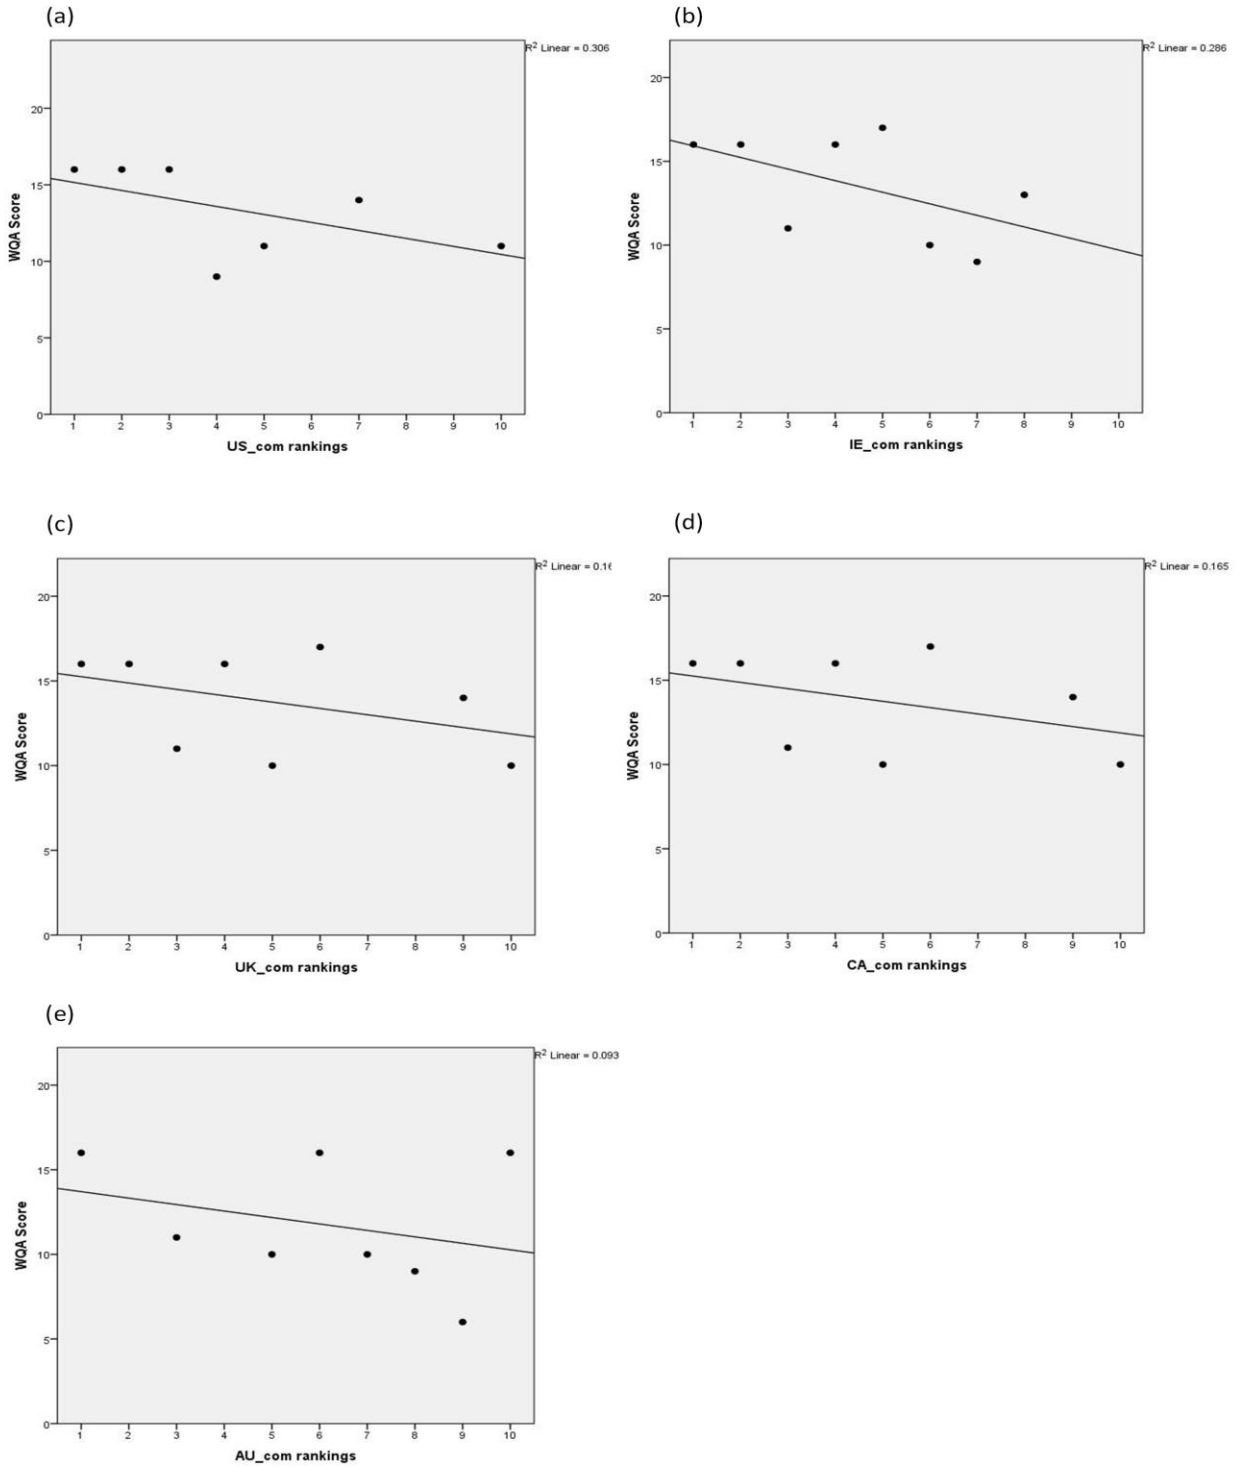

Supplement: jmir_v15i8e183_app2.pdf [file jmir_v15i8e183_app2.pdf]
